# Supplementary material for: Antioxidant Capacity, Inflammatory Response, Carcass Characteristics and Meat Quality of Hu Sheep in Response to Dietary Soluble Protein Levels with Decreased Crude Protein Content
Source: MDPI journal article supplement (doi:10.3390/antiox12122098), 2023-12-11
Supplement: s1 [file s1]

**Table S1.** Slaughter performance of Hu sheep fed low-protein diets with different soluble protein (SP) proportions.

| Parameters             | Treatments |       |       |       | SEM   | P-Value |
|------------------------|------------|-------|-------|-------|-------|---------|
|                        | CON        | SPA   | SPB   | SPC   |       |         |
| Live weight, kg        | 46.41      | 46.59 | 47.42 | 45.72 | 0.753 | 0.527   |
| Carcass weight, kg     | 20.42      | 21.21 | 21.22 | 20.78 | 0.701 | 0.747   |
| Dressing percentage, % | 43.99      | 45.53 | 44.74 | 45.45 | 0.653 | 0.228   |
| Meat percentage, %     | 31.16      | 31.66 | 33.26 | 32.32 | 0.744 | 0.354   |
| Bone–meat ratio        | 0.53       | 0.51  | 0.46  | 0.48  | 0.021 | 0.312   |

SEM = standard error of the mean. Treatments: CON had a crude protein (CP) content of 16.7% in the diet, based on NRC nutritional requirements; the CP content in the SPA, SPB, and SPC diets was reduced by ~10% with the SP proportion (% of CP) adjusted to 21.2, 25.9, and 29.4%, respectively.

**Table S2.** Visceral organs index (%) of Hu sheep under different treatments.

| Items    | Treatments |      |      |      | SEM   | <i>P</i> -Value |
|----------|------------|------|------|------|-------|-----------------|
|          | CON        | SPA  | SPB  | SPC  |       |                 |
| Heart    | 0.43       | 0.38 | 0.38 | 0.40 | 0.052 | 0.566           |
| Liver    | 1.62       | 1.43 | 1.47 | 1.45 | 0.209 | 0.680           |
| Spleen   | 0.16       | 0.17 | 0.18 | 0.19 | 0.043 | 0.866           |
| Lung     | 0.96       | 0.95 | 1.12 | 1.03 | 0.312 | 0.932           |
| Kidney   | 0.27       | 0.22 | 0.24 | 0.26 | 0.055 | 0.692           |
| Pancreas | 0.35       | 0.41 | 0.48 | 0.35 | 0.097 | 0.245           |

SEM = standard error of the mean. Treatments: CON had a crude protein (CP) content of 16.7% in the diet, based on NRC nutritional requirements; the CP content in the SPA, SPB, and SPC diets was reduced by ~10% with the soluble protein proportion (% of CP) adjusted to 21.2, 25.9, and 29.4%, respectively.
